mean also being compatible with clinically important effects, as the entire CI needs to be considered. Returning to the study by Colquhoun *et al.*, the CI suggests that the odds of postoperative pulmonary complications could plausibly be somewhere between 44% lower and up to 32% higher in one treatment group compared to the other. This is a difference that most clinicians would probably consider clinically relevant, and thus, the study does *not* demonstrate the lack of a clinically important association in either direction. The same is true in many other articles reporting nonsignificant study results. We believe it is important that authors and readers are aware that absence of evidence must not be confused with evidence of absence. A nonsignificant difference between treatment groups should be interpreted and reported in terms of insufficient evidence to reject the null hypothesis, but neither demonstrates the lack of a difference, nor the equivalence of treatments.

### Competing Interests

The authors declare no competing interests.

Patrick Schober, Ph.D., Stephan Alexander Loer, Ph.D., Lothar Andreas Schwarte, Ph.D. Amsterdam UMC, Vrije Universiteit Amsterdam, The Netherlands (all authors).  
p.schober@amsterdamumc.nl

The corresponding author of the original article referenced above has read the letter and does not have anything to add in a published reply.

DOI: 10.1097/ALN.0000000000003932

### References

1. Colquhoun DA, Leis AM, Shanks AM, Mathis MR, Naik BI, Durieux ME, Kheterpal S, Pace NL, Popescu WM, Schonberger RB, Kozower BD, Walters DM, Blasberg JD, Chang AC, Aziz ME, Harukuni I, Tieu BH, Blank RS: A Lower tidal volume regimen during one-lung ventilation for lung resection surgery is not associated with reduced postoperative pulmonary complications. *ANESTHESIOLOGY* 2021; 134:562–76
2. Schober P, Vetter TR: Noninferiority and equivalence trials in medical research. *Anesth Analg* 2020; 131:208–9
3. Schober P, Bossers SM, Schwarte LA: Statistical significance *versus* clinical importance of observed effect sizes: What do *P* values and confidence intervals really represent? *Anesth Analg* 2018; 126:1068–72
4. Schober P, Vetter TR: Confidence intervals in clinical research. *Anesth Analg* 2020; 130:1303

(Accepted for publication July 16, 2021. Published online first on September 8, 2021.)

## One-lung Ventilation and Complications: Comment

### To the Editor:

With great interest we have read the article by Douglas A. Colquhoun *et al.*<sup>1</sup> regarding the effect of lower tidal volume ventilation on postoperative pulmonary complication in patients undergoing lung resection surgery with one-lung ventilation. There are two important points of concern.

First, an *a priori* test was used to calculate the sample size by using a two-sided Z test with unpooled variance, and the results showed that 1,315 unmatched cases in each group (total study N = 2,630) provided 90% power at an alpha = 0.05 to detect a 5% difference. However, the Z test was used to calculate the sample size, whereas the conditional logistic regression model was used to analyze the relationship of protective ventilation and pulmonary complication (main outcome), and only 762 patients matched were enrolled in the logistic regression. We think that the sample size should be calculated according to the main outcome and corresponding main statistical analysis method, rather than using a different statistical method. Therefore, the power (90%) based on the Z test and corresponding sample size may mislead readers to believe the conclusion too much. Although there are many multivariate power analysis methods, none of them is generally accepted and feasible; therefore, we suggest that the authors use univariate power analysis with logistic regression to provide accurate power.<sup>2</sup>

Second, although this study defined the criteria of one-lung protective ventilation as both tidal volumes equal to or less than 5 ml/kg predicted body weight and median positive end-expiratory pressure greater than or equal to 5 cm H<sub>2</sub>O, the generally accepted definition of lung protective ventilation contained (1) tidal volume equal to or less than 5 ml/kg predicted body weight, (2) positive end-expiratory pressure greater than or equal to 5 cm H<sub>2</sub>O, and (3) lung recruitment maneuvers.<sup>3</sup> In addition, recruitment maneuvers are an important component of lung protective ventilation to reduce postoperative pulmonary complications.

### Competing Interests

The authors declare no competing interests.

Yihao Zhu, M.S., Fei Wang, M.S., Tao Zhu, M.D. West China Hospital of Sichuan University, Chengdu, China (T.Z.).  
739501155@qq.com

The corresponding author of the original article referenced above has read the letter and does not have anything to add in a published reply.

DOI: 10.1097/ALN.0000000000003933

## References

1. Colquhoun DA, Leis AM, Shanks AM, Mathis MR, Naik BI, Durieux ME, Kheterpal S, Pace NL, Popescu WM, Schonberger RB, Kozower BD, Walters DM, Blasberg JD, Chang AC, Aziz MF, Harukuni I, Tieu BH, Blank RS: A lower tidal volume regimen during one-lung ventilation for lung resection surgery is not associated with reduced postoperative pulmonary complications. *ANESTHESIOLOGY* 2021; 134:562–76
2. McDonald JH: *Handbook of Biological Statistics*, 3rd edition. Baltimore, Sparky House Publishing, 2014, pp 247–53
3. Güldner A, Kiss T, Serpa Neto A, Hemmes SN, Canet J, Spieth PM, Rocco PR, Schultz MJ, Pelosi P, Gama de Abreu M: Intraoperative protective mechanical ventilation for prevention of postoperative pulmonary complications: A comprehensive review of the role of tidal volume, positive end-expiratory pressure, and lung recruitment maneuvers. *ANESTHESIOLOGY* 2015; 123:692–713

(Accepted for publication July 16, 2021. Published online first on September 8, 2021.)

## One-lung Ventilation and Complications: Comment

### To the Editor:

In their retrospective observational analysis of patients undergoing one-lung ventilation during thoracic surgery, Colquhoun *et al.* did not detect an independent association between a low tidal lung protection ventilation regimen and a composite of postoperative pulmonary complications.<sup>1</sup> However, there are two additional factors that may have an impact on this finding.

First, the right lung is larger than the left lung. Normally, the left lung receives a smaller tidal volume than the right lung. By using the same tidal volume for both the left and right lungs, it is possible that a tidal volume that is protective for the right lung may be excessive for the left lung. Without accounting for this difference, it is possible that the left lung did not accrue the full benefit of low tidal volume ventilation and might have had greater injury.

Second, respiratory rate is one of the key variables through which mechanical ventilation may injure a patient.<sup>2–4</sup> Reduction of respiratory rate and tidal volume ameliorates lung inflammation and injury. An increased

respiratory rate may contribute to the development of dynamic hyperinflation and intrinsic positive end-expiratory pressure with multiple respiratory and hemodynamic consequences. It is well established that ventilator-induced lung injury is largely caused by the cyclic overstretch and/or collapse of alveoli. With a higher respiratory rate, there will be more such cycles and thus, more accumulated damage. Colquhoun's patients with protective ventilation had higher mean respiratory rates with larger SDs. It is possible that more patients in this group had sufficiently high respiratory rates which may have negated benefits that otherwise might have been seen with protective ventilation.

If there is a future study, it would be helpful to use different left and right lung tidal volumes, as well as ensure no differences in respiratory rate between protective ventilation and no protective ventilation patients. Such a study will require a large number of subjects and a very careful prospective study design.

### Competing Interests

The author declares no competing interests.

Jonathan V. Roth, M.D. Albert Einstein Medical Center, Philadelphia, Pennsylvania (retired), and Sidney Kimmel Medical College of the Thomas Jefferson University, Philadelphia, Pennsylvania (retired). jvroth1@aol.com

The corresponding author of the original article referenced above has read the letter and does not have anything to add in a published reply.

DOI: 10.1097/ALN.0000000000003934

### References

1. Colquhoun DA, Leis AM, Shanks AM, Mathis MR, Naik BI, Durieux ME, Kheterpal S, Pace NL, Popescu WM, Schonberger RB, Kozower BD, Walters DM, Blasberg JD, Chang AC, Aziz MF, Harukuni I, Tieu BH, Blank RS: A lower tidal volume regimen during one-lung ventilation for lung resection surgery is not associated with reduced postoperative pulmonary complications. *ANESTHESIOLOGY* 2021; 134:562–76
2. Akoumianaki E, Vaporidi K, Georgopoulos D: The injurious effects of elevated or nonelevated respiratory rate during mechanical ventilation. *Am J Respir Crit Care Med* 2019; 199:149–57
3. Conrad SA, Zhang S, Arnold TC, Scott LK, Carden DL: Protective effects of low respiratory frequency in experimental ventilator-associated lung injury. *Crit Care Med* 2005; 33:835–40
4. Hotchkiss JR Jr, Blanch L, Murias G, Adams AB, Olson DA, Wangenstein OD, Leo PH, Marini JJ: Effects of decreased respiratory frequency on ventilator-induced lung injury. *Am J Respir Crit Care Med* 2000; 161:463–8
